# Supplementary material for: Non-covalent functionalization of graphene oxide by pyrene-block copolymers for enhancing physical properties of poly(methyl methacrylate)
Source: Royal Society of Chemistry journal article supplement (doi:10.1039/c5ra14967c), 2015-01-01
Supplement: c5ra14967c1.pdf [file c5ra14967c1.pdf]

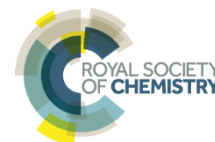

Journal Name

ARTICLE

## Non-covalent Functionalization of Graphene Oxide by Pyrene-Block Copolymers for Enhancing Physical Properties of Poly (methyl methacrylate)

Received 00th January 20xx,  
Accepted 00th January 20xx

DOI: 10.1039/x0xx00000x

[www.rsc.org/](http://www.rsc.org/)

Shiqiang Song,<sup>a</sup> Chaoying Wan,<sup>\*b</sup> Yong Zhang<sup>\*a</sup>

<sup>a</sup>School of Chemistry and Chemical Engineering, State Key Laboratory for Metal Matrix Composite Materials, Shanghai Jiao Tong University, Shanghai 200240, People's Republic of China.

E-mail: [yong\\_zhang@sjtu.edu.cn](mailto:yong_zhang@sjtu.edu.cn) (Y.Zhang)

<sup>b</sup>International Institute for Nanocomposites Manufacturing, WMG, University of Warwick, CV4 7AL, UK.

E-mail: [Chaoying.Wan@warwick.ac.uk](mailto:Chaoying.Wan@warwick.ac.uk) (C.Wan).

†Electronic Supplementary Information (ESI) available: GPC of Py-PMMA-Br and Py-PMMA-*b*-PDMS, FTIR spectrum of GO, GO@Py-PMMA-*b*-PDMS and Py-PMMA-*b*-PDMS, DSC spectra, SEM images and summary of composites mechanical properties. See DOI: 10.1039/x0xx00000x

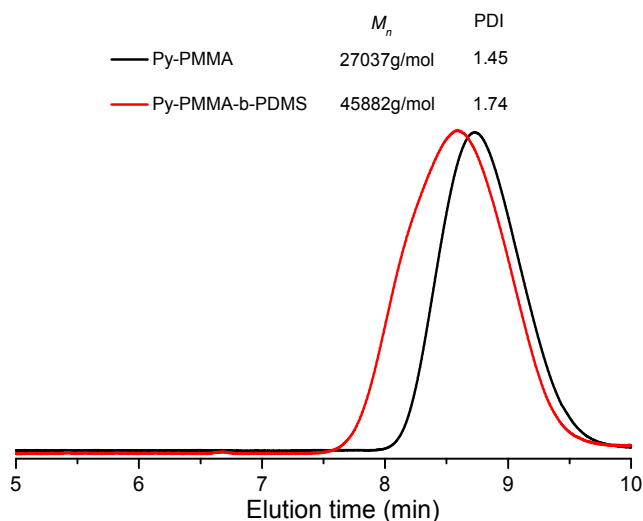

Figure S1. GPC traces of Py-PMMA-Br and Py-PMMA-*b*-PDMS in DMF with flow rate of 1 ml/min.

Table S1 Experimental characteristics of the Py-PMMA-Br and Py-PMMA-*b*-PDMS when polymerization via ARGET ATRP from initiator Py-Br.

| Sample                  | DP <sub>tar</sub><br>get | Conv. <sup>a</sup> /<br>% | $M_{n,theo}$ <sup>b</sup> /<br>g mol <sup>-1</sup> | $M_{n,GPC}$ <sup>c</sup> /<br>g mol <sup>-1</sup> | PDI <sup>c</sup> | DP <sub>MM</sub> <sup>d</sup> | DP <sub>VTDM</sub> <sup>d</sup> |
|-------------------------|--------------------------|---------------------------|----------------------------------------------------|---------------------------------------------------|------------------|-------------------------------|---------------------------------|
| Py-PMMA-Br              | 400                      | 54                        | 21901                                              | 27037                                             | 1.45             | 216                           | -                               |
| Py-PMMA- <i>b</i> -PDMS | 40                       | 8.7                       | 41841                                              | 45882                                             | 1.74             | 216                           | 3.5                             |

<sup>a</sup> Conversion was obtained gravimetrically.

<sup>b</sup>  $M_{n,theo} = M_{initiator} + ([monomer]_0/[initiator]_0) \times conversion \times M_{monomer}$ .

<sup>c</sup>  $M_n$  based on GPC using DMF as eluent and PMMA as standards.

<sup>d</sup> (degree of polymerization) calculated by conversion.

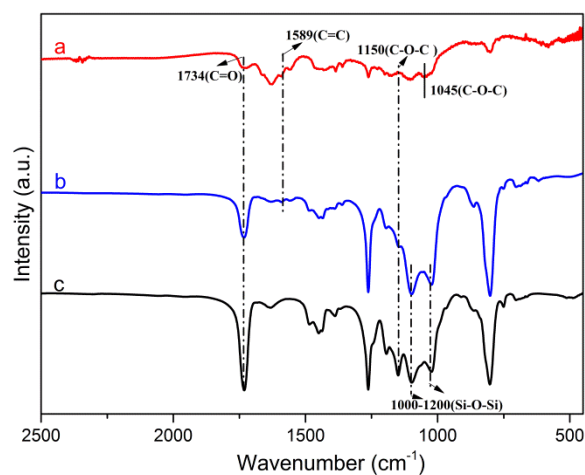

Figure S2. FT-IR spectra of (a) GO, (b) GO@Py-PMMA-*b*-PDMS and (c) Py-PMMA-*b*-PDMS.

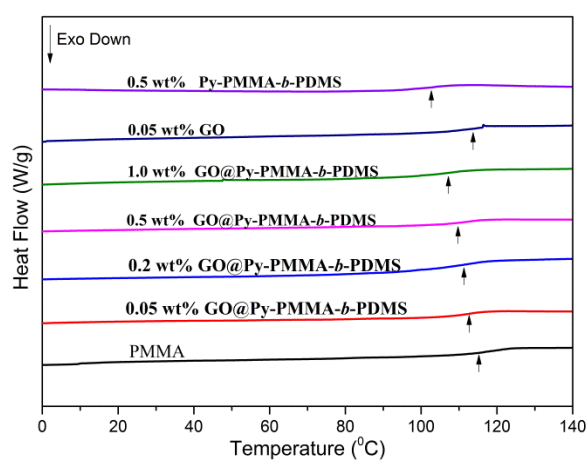

Figure S3. DSC spectra of pure PMMA and composites containing different loading amounts of GO in GO@Py-PMMA-*b*-PDMS/PMMA, 0.5 wt% Py-PMMA-*b*-PDMS and 0.05 wt% GO.

Table S2 Summary of Young's modulus, tensile strength, elongation at break and toughness of PMMA and composites from stress-strain curves at 30°C.

| GO@Py-PMMA- <i>b</i> -PDMS Content (wt%) | Young's modulus (MPa) | Tensile strength (MPa) | Elongation at break (%) | Toughness (J/g) |
|------------------------------------------|-----------------------|------------------------|-------------------------|-----------------|
| 0                                        | 846.3±27.3            | 16.4±0.8               | 39.6±1.9                | 5.1±0.1         |
| 0.05wt%                                  | 1037.1±51.1           | 25.1±1.2               | 86.1±4.3                | 16.2±0.4        |
| 0.2wt%                                   | 1214.5±60.5           | 26.8±1.3               | 60.5±3.0                | 12.4±0.3        |
| 0.5wt%                                   | 1067.6±53.2           | 25.7±1.3               | 68.9±3.4                | 13.7±0.3        |
| 1.0wt%                                   | 1020.6±51.0           | 21.1±1.1               | 66.6±3.3                | 10.7±0.2        |
| Py-PMMA- <i>b</i> -PDMS (0.5 wt%)        | 809.6±73.1            | 17.2±1.1               | 88.9±4.4                | 10.8±0.3        |
| GO (0.05 wt%)                            | 906.6±73.1            | 20.5±1.3               | 13.2±3.2                | 3.9±0.2         |

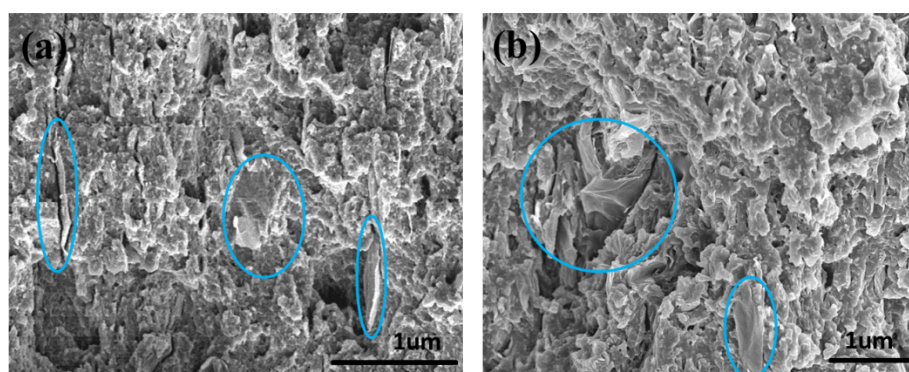

Figure S4. The high-magnification SEM images of the selected regions: (a) 0.5 wt% GO and (b) 1.0 wt% GO in GO@Py-PMMA-*b*-PDMS/PMMA.
